# Supplementary material for: Spatial-Tunable Au Nanoparticle Functionalized Si Nanorods Arrays for Surface Enhanced Raman Spectroscopy
Source: MDPI journal article supplement (doi:10.3390/nano10071317), 2020-07-04
Supplement: s1 [file s1]

Supporting Information

# **Spatial-Tunable Au Nanoparticle Functionalized Si Nanorods arrays for Surface Enhanced Raman Spectroscopy**

**Dongdong Lin\*, Kunjie Dai, Tianxiang Yu, Wenhui Zhao and Wenwu Xu\***

Department of Microelectronic Science and Engineering, Department of physics, School of Physical Science and Technology, Ningbo University, 818 Fenghua Road, Ningbo 315211, China;  
lindongdong@nbu.edu.cn; 176000229@nbu.edu.cn; @nbu.edu.cn; 176001983@nbu.edu.cn;  
@nbu.edu.cn; zhaowenhui@nbu.edu.cn

\* Correspondence: xuwenwu@nbu.edu.cn; lindongdong@nbu.edu.cn

1. Absorption of AuNPs measured by UV-vis spectrum

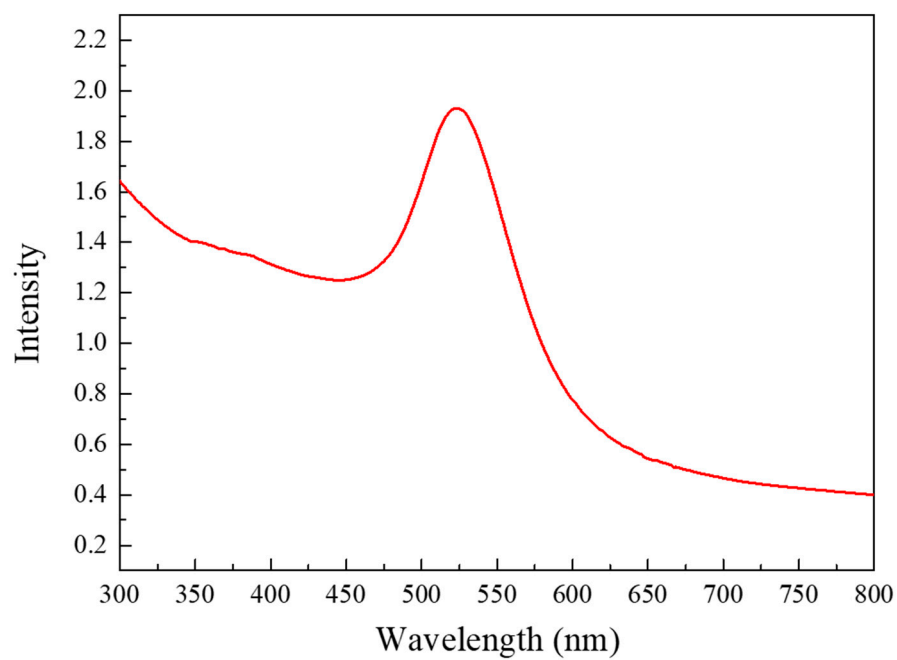

Figure S1. UV-Vis spectrum of fabricated AuNPs in water solution.

2. Raman spectra of R6G molecules from  $10^{-6}$  to  $10^{-9}$  M

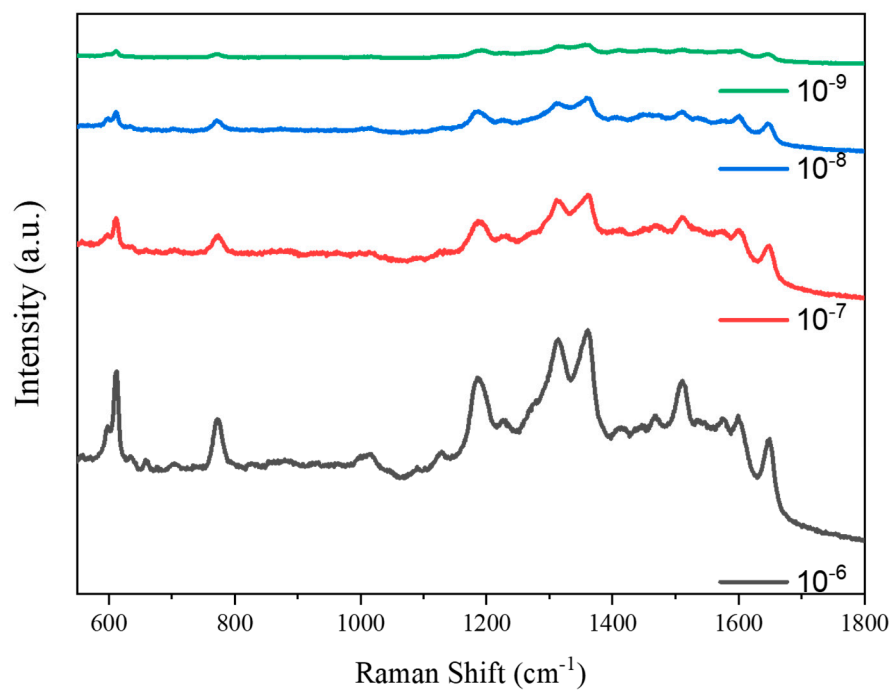

Figure S2. Raman spectra of R6G molecules from  $10^{-6}$  to  $10^{-9}$  M by T-SiNRs@AuNPs substrate.

### 3. The FDTD model for simulation

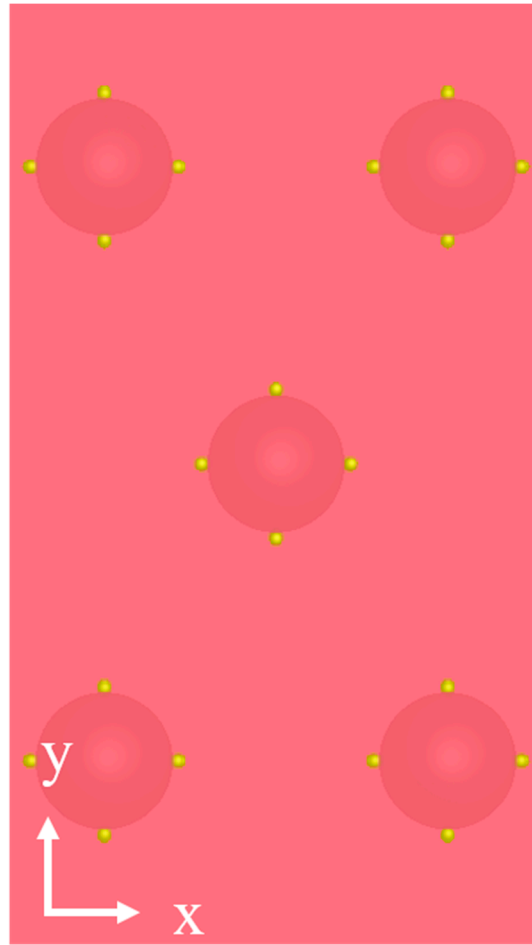

Figure S3. Top view of S-SiNRs@AuNPs array in FDTD simulation. Due to the calculation ability of computer, four directions along the z-axis of each SiNR were placed with AuNPs in 20 nm diameter.

4. The EF of R6G was calculated using the following formula with the enhanced Raman peak of 1361  $\text{cm}^{-1}$ .

$$EF = \frac{I_{SERS}/(\mu_M \mu_S A_M)}{I_{RS}/(C_{RS} H_{eff})}$$

This formula is corrected for the solid periodic nanostructure SERS substrate with a rigorous definition of  $N_{surf}$  and  $N_{Vol}$ .<sup>1,2</sup>

$I_{SERS}$  : the enhanced Raman intensity of measured molecules;

$I_{RS}$  : the common Raman intensity of molecules without Raman enhancement.

$\mu_M$  : surface density of the individual SiNRs producing the enhancement and

$\mu_S$  : surface density of molecules on the metal.

$A_M$  : surface area of one SiNR.

$C_{RS}$  : the concentration of the used molecules in common Raman measurement.

$H_{eff}$  : the effective height of scattering volume of the SiNRs.

In our case, the normal Raman spectrum was obtained from the probe volume of R6G solid film on clear silicon wafer.

## Reference

1. Le Ru, E. C.; Blackie, E.; Meyer, M.; Etchegoin, P. G. Surface Enhanced Raman Scattering Enhancement Factors: A Comprehensive Study. *The Journal of Physical Chemistry C* **2007**, 111, 13794-13803.
2. Huang, J. A.; Zhao, Y. Q.; Zhang, X. J.; He, L. F.; Wong, T. L.; Chui, Y. S.; Zhang, W. J.; Lee, S. T. Ordered Ag/Si nanowires array: wide-range surface-enhanced Raman spectroscopy for reproducible biomolecule detection. *Nano Lett* **2013**, 13, 5039-45.
